# Supplementary material for: Endothelial cell-derived interleukin-6 regulates tumor growth
Source: PubMed Central journal article supplement (PMC4016552; doi:10.1186/1471-2407-14-99), 2014-02-17

## Supplementary Figure Legends

**Supplementary Figure S1. Blockade of endothelial cell-induced STAT3 phosphorylation in tumor cells does not affect Akt and ERK pathways, whereas inhibition of Akt or ERK has a compensatory mechanism.** HeLa cells were serum-starved overnight and exposed to *A*, HDMEC conditioned medium (CM) or unconditioned medium (EBM) for the indicated time points. In addition, HeLa cells were pre-incubated for 1 to 2 hours with *B*, 20  $\mu$ M Stattic, *C*, 20  $\mu$ M LY294002, or *D*, 20  $\mu$ M U0126, and then exposed to HDMEC CM or EBM for the indicated time points. Phosphorylated and total STAT3, Akt, and ERK levels were determined by Western blot.

**Supplementary Figure S2. IL-6 potently activates STAT3 signaling in cervical adenocarcinoma cells.** HeLa cells were serum-starved overnight and exposed to 20 ng/ml rhIL-6 for the indicated time points. Phosphorylated and total levels of STAT3, Akt, and ERK were determined by Western blots. *A*, HeLa cells exposed to rhIL-6. HeLa cells pre-incubated for 1 to 2 hours with *B*, 20  $\mu$ M Stattic; *C*, 20  $\mu$ M LY294002; or *D*, 20  $\mu$ M U0126, and then exposed to rhIL-6 for the indicated time points.

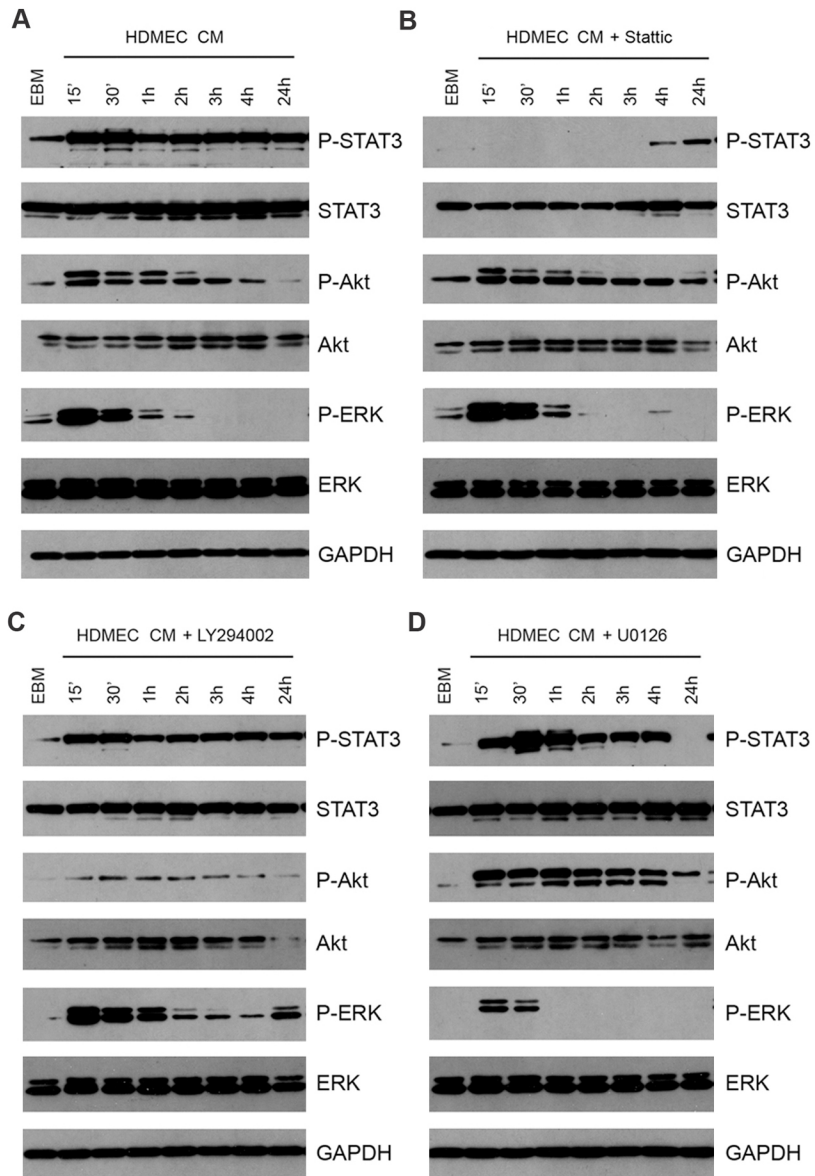

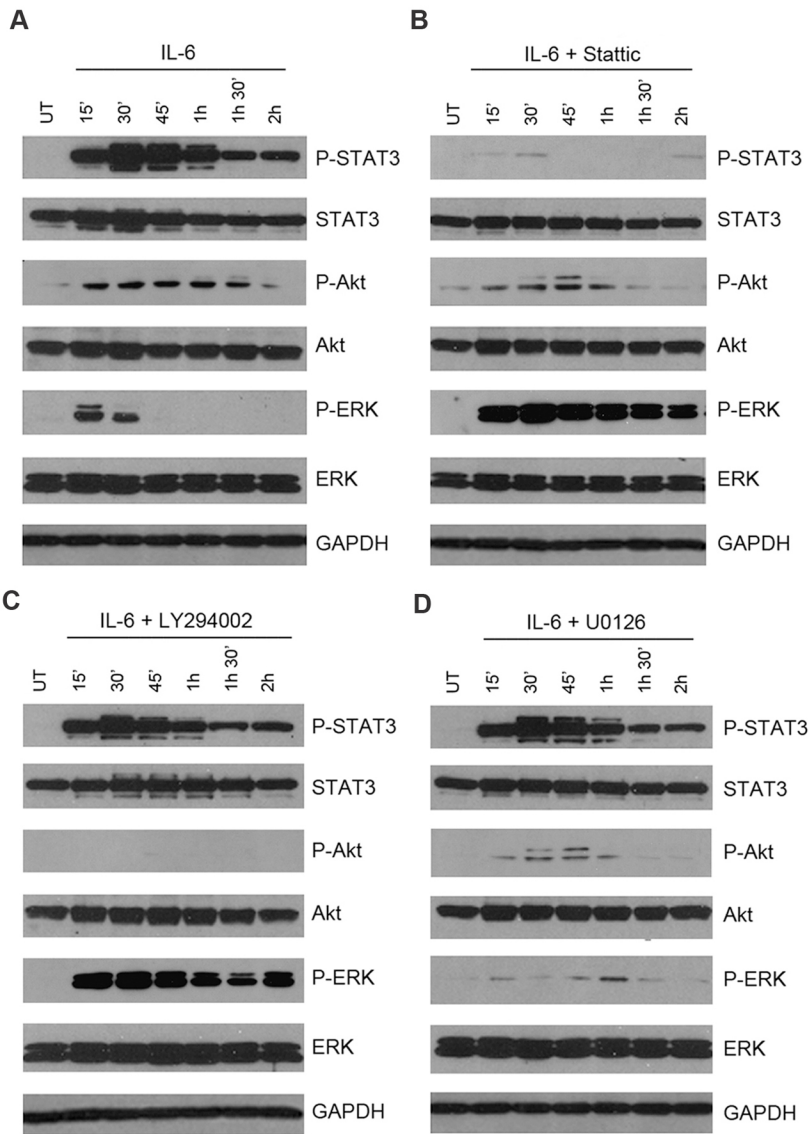

Supplement: 1471-2407-14-99-S1.pdf [file 1471-2407-14-99-S1.pdf]
